# Supplementary material for: Making the best of it: nitroxide-mediated polymerization of methacrylatesviathe copolymerization approach with functional styrenics
Source: Royal Society of Chemistry journal article supplement (doi:10.1039/c9py01458f), 2019-11-19
Supplement: c9py01458f1.pdf [file c9py01458f1.pdf]

Supporting Information for

## Making the Best of It: Nitroxide-Mediated Polymerization of Methacrylates via the Copolymerization Approach with Functional Styrenics

Aaron C. Schmidt,<sup>a,b,‡</sup> Hatice Turgut,<sup>a,b,‡</sup> Dao Le,<sup>a,b</sup> Ana Beloqui,<sup>a,b,c</sup> Guillaume Delaittre<sup>a,b,d,e\*</sup>

<sup>a</sup>*Institute of Toxicology and Genetics, Karlsruhe Institute of Technology (KIT), Hermann-von-Helmholtz-Platz 1, 76344 Eggenstein-Leopoldshafen, Germany*

<sup>b</sup>*Institute for Chemical Technology and Polymer Chemistry, Karlsruhe Institute of Technology (KIT), Engesserstrasse 15, 76131 Karlsruhe, Germany*

<sup>c</sup>*CICnanoGUNE, Avda. Tolosa 76, 20018 San Sebastián, Spain*

<sup>d</sup>*Institute for Applied Polymer Chemistry, University of Applied Sciences Aachen, Heinrich-Mußmann-Strasse 1, 52428 Jülich, Germany*

<sup>e</sup>*Deutsches Textilforschungszentrum Nord-West (DTNW) gGmbH, Adlerstrasse 1, 47798 Krefeld, Germany*

<sup>‡</sup>These authors have contributed equally to this work

\*Corresponding author: [guillaume.delaittre@kit.edu](mailto:guillaume.delaittre@kit.edu) (E-mail); @GPRDelaittre (Twitter)

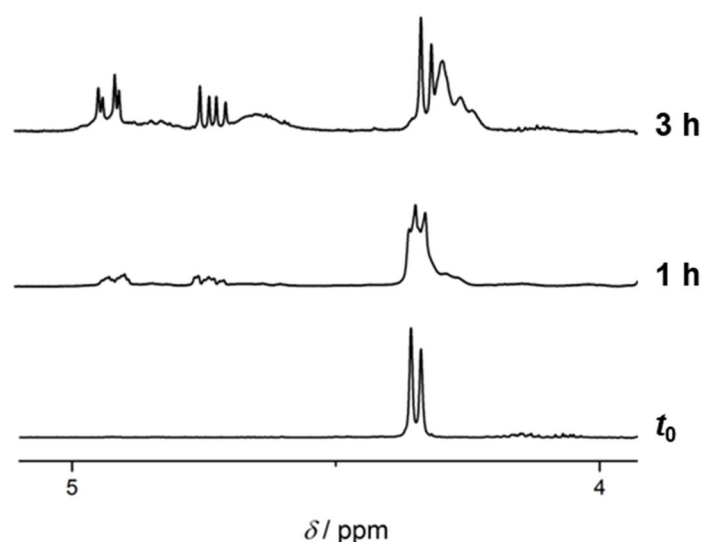

**Figure S1.** Evolution with polymerization time of the 4–5 ppm region <sup>1</sup>H NMR spectrum corresponding to the SG1-mediated polymerization of MMA in toluene at 80 °C, in the presence of 5 mol% of 4-azidomethylstyrene. Two unknown peaks around 4.7–4.9 ppm appear progressively.

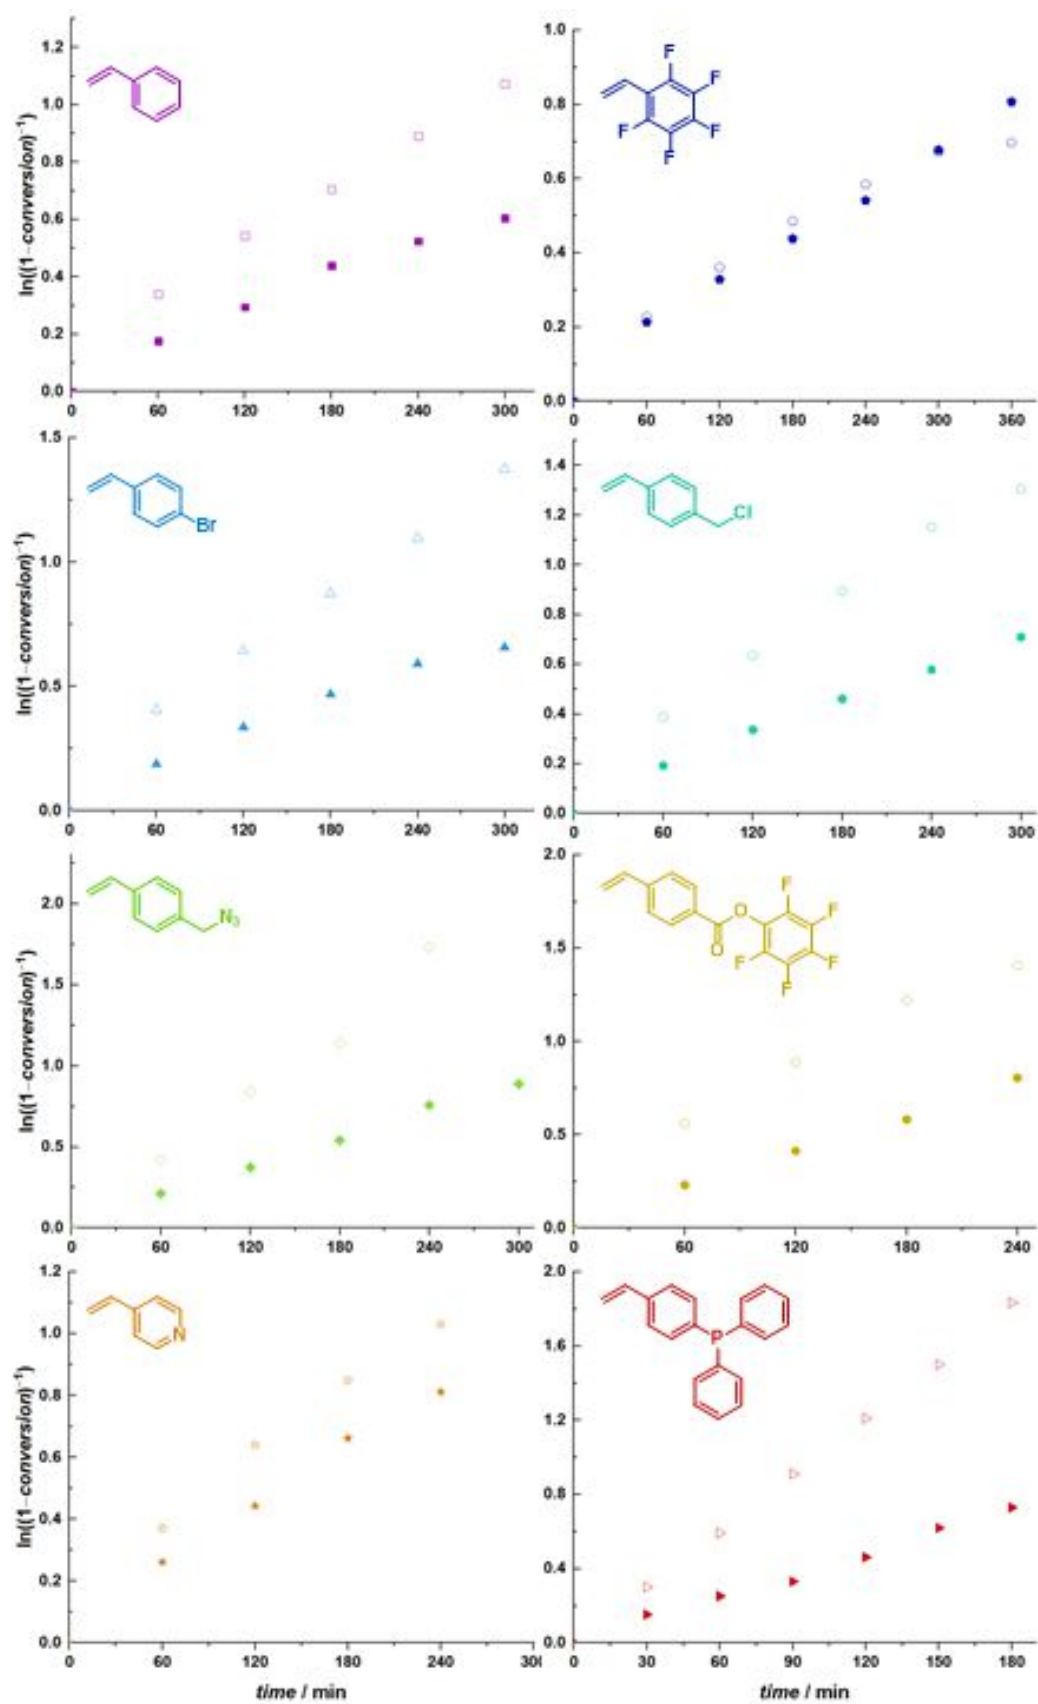

**Figure S2.** Evolution of individual comonomer conversions with time during the SG1-mediated polymerization of MMA in toluene at 80 °C, in the presence of 5 mol% of various styrenics. Full symbols: MMA. Empty symbols: Styrenic comonomer.

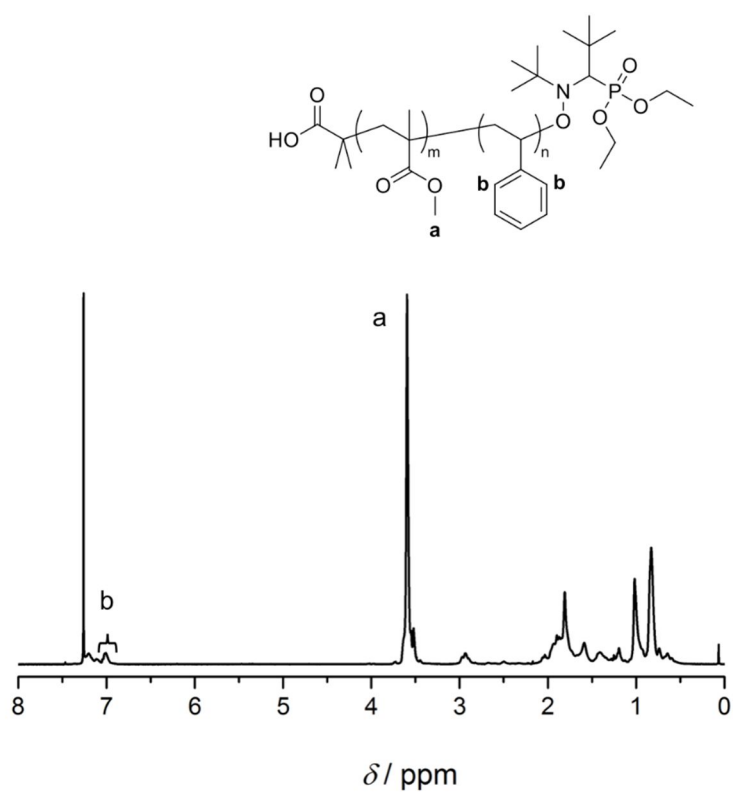

**Figure S3.**  $^1\text{H}$  NMR spectrum of the purified P(MMA-*co*-Sty) macroinitiator.

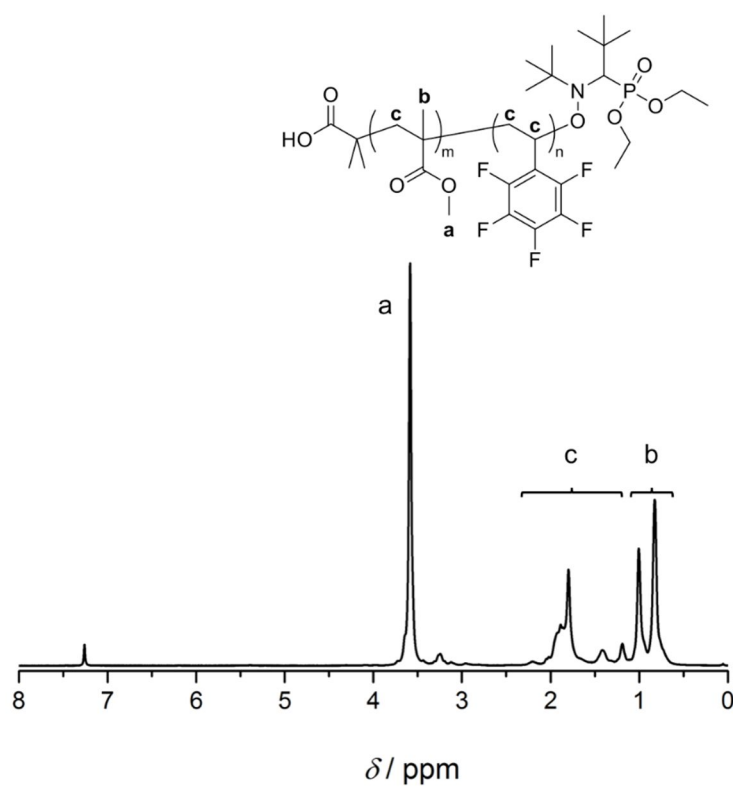

**Figure S4.**  $^1\text{H}$  NMR spectrum of the purified P(MMA-*co*-PFS) macroinitiator.

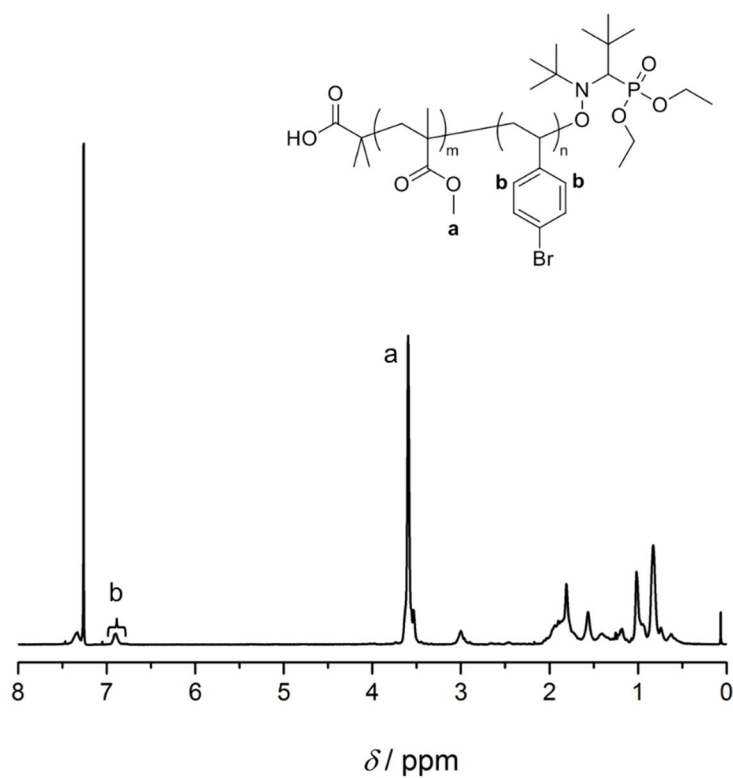

**Figure S5.**  $^1\text{H}$  NMR spectrum of the purified P(MMA-co-BrS) macroinitiator.

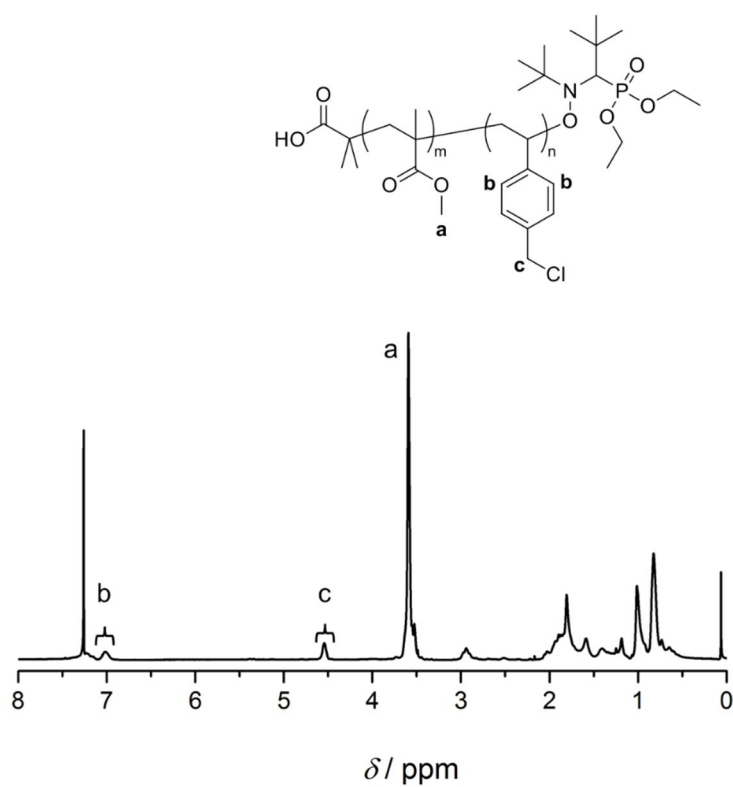

**Figure S6.**  $^1\text{H}$  NMR spectrum of the purified P(MMA-co-CMS) macroinitiator.

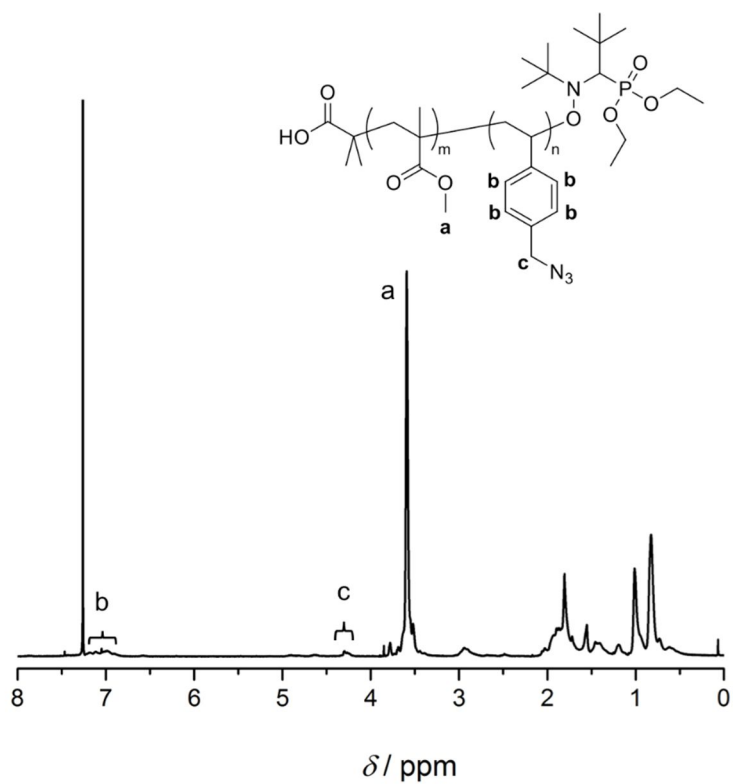

**Figure S7.**  $^1\text{H}$  NMR spectrum of a purified P(MMA-co-AMS) polymer.

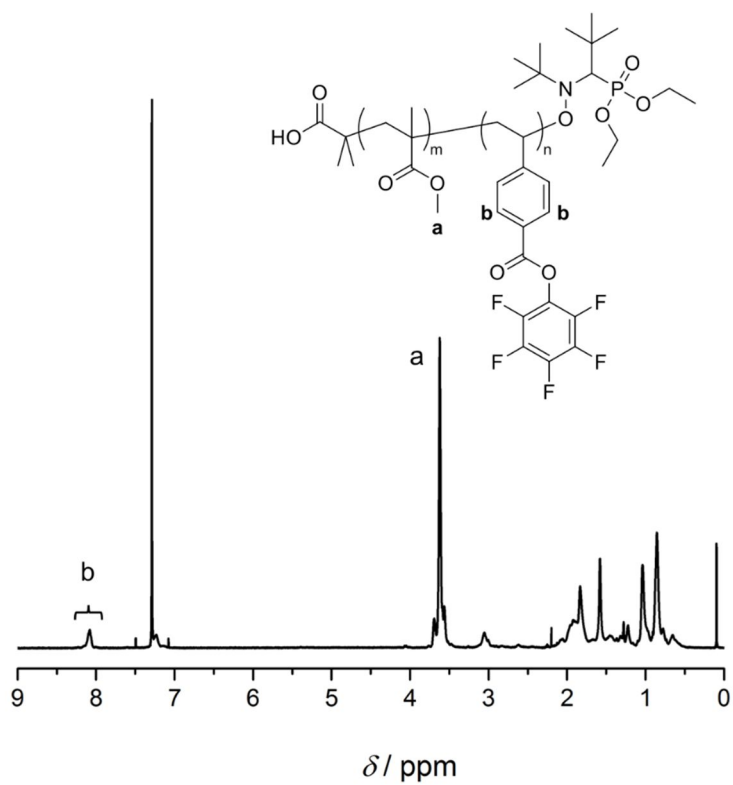

**Figure S8.**  $^1\text{H}$  NMR spectrum of the purified P(MMA-co-PFPVB) macroinitiator.

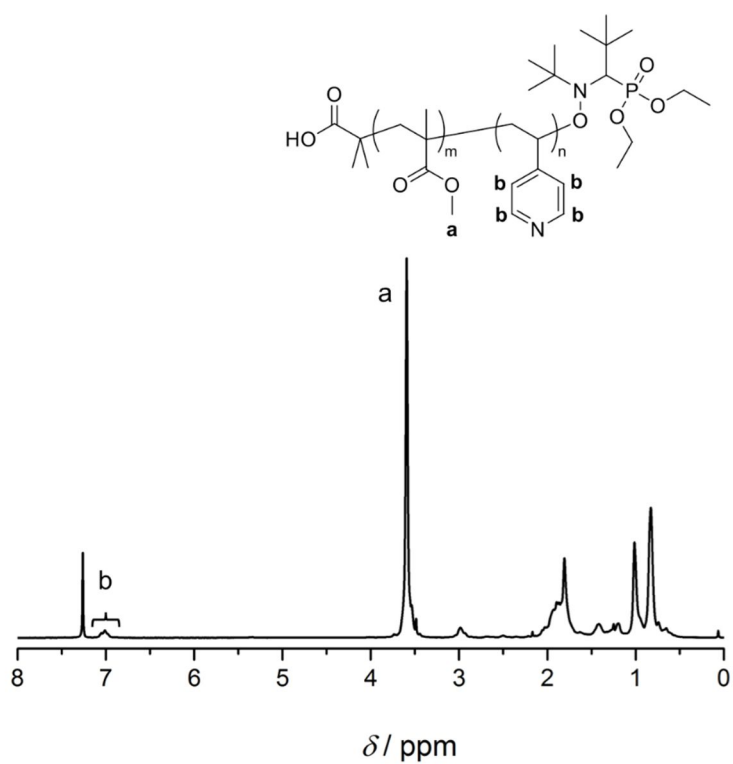

**Figure S9.**  $^1\text{H}$  NMR spectra of the purified P(MMA-co-4VP) polymer.

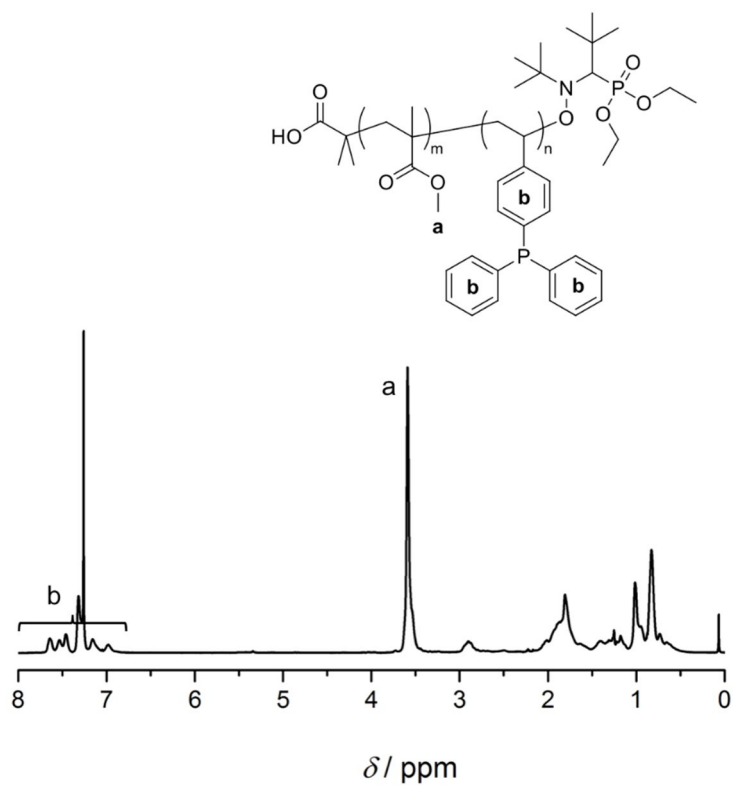

**Figure S10.**  $^1\text{H}$  NMR spectra of the purified P(MMA-co-DPPS) macroinitiator.

**Table S1.** Refractive index values of some brominated polymers and their non-brominated counterparts as found in the Polymer Handbook.

| Polymer                                   | $n_D$         |
|-------------------------------------------|---------------|
| Poly(2-bromoethyl methacrylate)           | 1.5426        |
| Poly(ethyl methacrylate)                  | 1.4850        |
| Poly(pentabromophenyl methacrylate)       | 1.7100        |
| Poly( <i>p</i> -bromophenyl methacrylate) | 1.5964        |
| Poly(phenyl methacrylate)                 | 1.5706        |
| Poly(cyclohexyl $\alpha$ -bromoacrylate)  | 1.5420        |
| Poly(cyclohexyl methacrylate)             | 1.5066        |
| Poly(2,3-dibromopropyl methacrylate)      | 1.5739        |
| Poly( <i>n</i> -propyl methacrylate)      | 1.4840        |
| Poly(methyl $\alpha$ -bromoacrylate)      | 1.5672        |
| Poly(methyl acrylate)                     | 1.4720–1.4800 |
| Poly(phenyl $\alpha$ -bromoacrylate)      | 1.6120        |
| Poly(phenyl methacrylate)                 | 1.5706        |
